# Supplementary material for: Status of dental caries and associated factors in Tibetan adults: findings from the fourth China National Oral Health Survey
Source: Springer Nature journal article supplement (doi:10.1186/s12903-020-01225-0), 2020-09-07
Supplement: MOESM1 [file 18355112]

8. 您使用牙膏刷牙吗？（只选一个答案）  
 1) 是 2) 否 3) 不知道（选 2 或 3 项者不回答第 9 题）
9. 您使用含氟牙膏刷牙吗？（只选一个答案）  
 1) 是 2) 否 3) 不知道
10. 您看过牙吗？（只选一个答案）  
 1) 看过 2) 从没看过牙（选 2 项者不回答第 11 至 15 题）
11. 您最近一次看牙距现在多长时间？（只选一个答案）  
 1) 6 个月以内 2) 6 个月至 12 个月（选 1 或 2 项者不回答第 16 题）  
 3) 12 个月以上（选 3 项者不回答第 12 至 15 题）
12. 您最近一次看牙的主要原因是什么？（只选一个答案）  
 1) 咨询检查 2) 预防 3) 治疗 4) 不知道
13. 在过去的一年内您看牙的总费用是 \_\_\_\_\_ 元？（请填写一个整数，不知道或拒绝回答的填写“N”）
14. 在上述看牙费用中，您个人需要支付的比例是 \_\_\_\_\_ %。（请填写一个整数，不知道或拒绝回答的填写“N”）
15. 您上一次看牙，费用是否可报销？（可多选）  
 1) 城镇职工基本保险 2) 城镇居民基本医疗保险  
 3) 新型农村合作医疗 4) 商业保险  
 5) 公费医疗 6) 其他途径报销  
 7) 全部自费（没有报销）
16. 您过去 12 个月内没有看过牙的原因是？（可多选）  
 1) 牙齿没有问题 2) 牙病不重  
 3) 没有时间 4) 经济困难，看不起牙  
 5) 看牙不能报销 6) 附近没有牙医  
 7) 害怕传染病 8) 害怕看牙疼痛  
 9) 很难找到信得过的牙医 10) 挂号太难  
 11) 其它原因
17. 您是否有以下的医疗保障？(每小题选一个答案)
- |               | 是 1                      | 否 2                      |
|---------------|--------------------------|--------------------------|
| 1) 城镇职工基本医疗保险 | <input type="checkbox"/> | <input type="checkbox"/> |
| 2) 城镇居民基本医疗保险 | <input type="checkbox"/> | <input type="checkbox"/> |
| 3) 新型农村合作医疗   | <input type="checkbox"/> | <input type="checkbox"/> |
| 4) 商业保险       | <input type="checkbox"/> | <input type="checkbox"/> |
| 5) 公费医疗       | <input type="checkbox"/> | <input type="checkbox"/> |

18. 在过去的 12 个月内, 您洗过牙吗?

1) 是 2) 否 (选 2 项者不回答第 19 题)

19. 您洗牙费用的报销方式是 (可多选)

- 1) 城镇职工基本保险 2) 城镇居民基本医疗保险  
3) 新型农村合作医疗 4) 商业保险  
5) 公费医疗 6) 其他途径报销  
7) 全部自费 (没有报销)

20. 口腔问题对您以下方面的影响有多大? (55-64 岁年龄组不回答此题, 每小题选一个答案)

|                                      | 1                        | 2                        | 3                        | 4                        | 5                        |
|--------------------------------------|--------------------------|--------------------------|--------------------------|--------------------------|--------------------------|
|                                      | 很经常                      | 经常                       | 有时                       | 很少                       | 无                        |
| 1) 您经常因为牙齿或假牙的原因限制所吃食物的种类和数量吗?       | <input type="checkbox"/> | <input type="checkbox"/> | <input type="checkbox"/> | <input type="checkbox"/> | <input type="checkbox"/> |
| 2) 您在咬或咀嚼食物时有困难吗?                    | <input type="checkbox"/> | <input type="checkbox"/> | <input type="checkbox"/> | <input type="checkbox"/> | <input type="checkbox"/> |
| 3) 您吞咽食物时经常会感到不舒服或困难吗?               | <input type="checkbox"/> | <input type="checkbox"/> | <input type="checkbox"/> | <input type="checkbox"/> | <input type="checkbox"/> |
| 4) 您的牙齿或假牙妨碍您说话吗?                    | <input type="checkbox"/> | <input type="checkbox"/> | <input type="checkbox"/> | <input type="checkbox"/> | <input type="checkbox"/> |
| 5) 您吃东西时经常感到口腔内不舒服吗?                 | <input type="checkbox"/> | <input type="checkbox"/> | <input type="checkbox"/> | <input type="checkbox"/> | <input type="checkbox"/> |
| 6) 您经常因为牙齿或假牙的原因而限制自己与他人的交往吗?        | <input type="checkbox"/> | <input type="checkbox"/> | <input type="checkbox"/> | <input type="checkbox"/> | <input type="checkbox"/> |
| 7) 您经常对您牙齿、牙龈或假牙的外观感到不满意或不愉快吗?       | <input type="checkbox"/> | <input type="checkbox"/> | <input type="checkbox"/> | <input type="checkbox"/> | <input type="checkbox"/> |
| 8) 您经常用药物缓解口腔的疼痛或不适吗?                | <input type="checkbox"/> | <input type="checkbox"/> | <input type="checkbox"/> | <input type="checkbox"/> | <input type="checkbox"/> |
| 9) 您经常担心或关注您的牙齿、牙龈或假牙的问题吗?           | <input type="checkbox"/> | <input type="checkbox"/> | <input type="checkbox"/> | <input type="checkbox"/> | <input type="checkbox"/> |
| 10) 您经常因为牙齿、牙龈或假牙的问题而在别人面前感到紧张或不自在吗? | <input type="checkbox"/> | <input type="checkbox"/> | <input type="checkbox"/> | <input type="checkbox"/> | <input type="checkbox"/> |
| 11) 您经常因为牙齿或假牙的问题而在别人面前吃东西时感到不舒服吗?   | <input type="checkbox"/> | <input type="checkbox"/> | <input type="checkbox"/> | <input type="checkbox"/> | <input type="checkbox"/> |
| 12) 您的牙齿或牙龈对冷、热或甜刺激敏感吗?              | <input type="checkbox"/> | <input type="checkbox"/> | <input type="checkbox"/> | <input type="checkbox"/> | <input type="checkbox"/> |

21. 您对自己的全身健康状况评价如何? (只选一个答案)

- 1) 很好 2) 较好 3) 一般  
4) 较差 5) 很差

22. 您对自己的牙齿和口腔状况评价如何? (只选一个答案)

- 1) 很好 2) 较好 3) 一般  
4) 较差 5) 很差

23. 您对以下说法的看法如何? (每小题选一个答案)

|                             | 1                        | 2                        | 8                        | 9                        |
|-----------------------------|--------------------------|--------------------------|--------------------------|--------------------------|
|                             | 同意                       | 不同意                      | 无所谓                      | 不知道                      |
| 1)口腔健康对自己的生活很重要             | <input type="checkbox"/> | <input type="checkbox"/> | <input type="checkbox"/> | <input type="checkbox"/> |
| 2)定期口腔检查是十分必要的              | <input type="checkbox"/> | <input type="checkbox"/> | <input type="checkbox"/> | <input type="checkbox"/> |
| 3)牙齿的好坏是天生的, 与自己的<br>保护关系不大 | <input type="checkbox"/> | <input type="checkbox"/> | <input type="checkbox"/> | <input type="checkbox"/> |
| 4)预防牙病首先靠自己                 | <input type="checkbox"/> | <input type="checkbox"/> | <input type="checkbox"/> | <input type="checkbox"/> |

24. 你认为下面的说法是否正确? (每小题选一个答案)

|                         | 1                        | 2                        | 8                        |
|-------------------------|--------------------------|--------------------------|--------------------------|
|                         | 正确                       | 不正确                      | 不知道                      |
| 1) 刷牙时牙龈出血是正常的          | <input type="checkbox"/> | <input type="checkbox"/> | <input type="checkbox"/> |
| 2) 细菌可以引起牙龈发炎           | <input type="checkbox"/> | <input type="checkbox"/> | <input type="checkbox"/> |
| 3) 刷牙对预防牙龈出血 <b>没有用</b> | <input type="checkbox"/> | <input type="checkbox"/> | <input type="checkbox"/> |
| 4) 细菌可以引起龋齿             | <input type="checkbox"/> | <input type="checkbox"/> | <input type="checkbox"/> |
| 5) 吃糖可以导致龋齿             | <input type="checkbox"/> | <input type="checkbox"/> | <input type="checkbox"/> |
| 6) 氟化物对保护牙齿 <b>没有用</b>  | <input type="checkbox"/> | <input type="checkbox"/> | <input type="checkbox"/> |
| 7) 窝沟封闭可保护牙齿            | <input type="checkbox"/> | <input type="checkbox"/> | <input type="checkbox"/> |
| 8) 口腔疾病可能会影响全身健康        | <input type="checkbox"/> | <input type="checkbox"/> | <input type="checkbox"/> |

25. 你是否曾经患过由医生确诊过的下列慢性病? (可多选)

- 1) 中风      2) 糖尿病      3) 高血压  
4) 心脏病      5) 慢性阻塞性肺部疾病      6) 其它, 请注明\_\_\_\_\_
- 7) 没有      8) 不知道

26. 您家里共同生活的有几口人? \_\_\_\_\_ 人(请填一个整数, 拒绝回答的填写“N”);

27. 您家在过去的12个月内的总收入大约是多少? \_\_\_\_\_万元/年(请填一个整数, 拒绝回答的填写“N”).

十分感谢您的合作!
